# Supplementary material for: Synthesis of plant-soil feedback effects on eastern North American tree species: implications for climate-adaptive forestry
Source: Frontiers journal article supplement (doi:10.3389/fevo.2023.1073724), 2023-05-19
Supplement: Data_Sheet_1.DOCX [file Data_Sheet_1.DOCX]

Refsland, T. R., B. Adams, D. Bronson, C. C. Kern, P. Marquardt, A. McGraw, A. Royo, and J. R. Miesel. Synthesis of plant-soil feedback effects on eastern North American trees: implications for climate-adaptive forestry. *Frontiers in Ecology and Evolution*.

**Data sources comprising the meta-analysis on plant-soil feedback effects on eastern North American tree growth**

**Data Sources**

Bennett, A. E., Rubert-Nason, K. R., and Lindroth, R. L. (2020). Response of aspen genotypes to browsing damage is not influenced by soil community diversity. *Plant Soil* 452, 153–170. doi: [10.1007/s11104-020-04466-8](https://doi.org/10.1007/s11104-020-04466-8).

Bennett, J. A., Maherali, H., Reinhart, K. O., Lekberg, Y., Hart, M. M., and Klironomos, J. (2017). Plant-soil feedbacks and mycorrhizal type influence temperate forest population dynamics. *Science* 355, 181–184. doi: [10.1126/science.aai8212](https://doi.org/10.1126/science.aai8212).

Bray, S. R., Kitajima, K., and Sylvia, D. M. (2003). Mycorrhizae differentially alter growth, physiology, and competitive ability of an invasive shrub. *Ecological Applications* 13, 565–574. doi: [10.1890/1051-0761(2003)013[0565:MDAGPA]2.0.CO;2](https://doi.org/10.1890/1051-0761(2003)013%5b0565:MDAGPA%5d2.0.CO;2).

Carteron, A., Parasquive, V., Blanchard, F., Guilbeault-Mayers, X., Turner, B. L., Vellend, M., et al. (2020). Soil abiotic and biotic properties constrain the establishment of a dominant temperate tree into boreal forests. *Journal of Ecology* 108, 931–944. doi: [10.1111/1365-2745.13326](https://doi.org/10.1111/1365-2745.13326).

Coughlin, E. M., Shefferson, R. P., Clark, S. L., and Wurzburger, N. (2021). Plant–soil feedbacks and the introduction of *Castanea* (chestnut) hybrids to eastern North American forests. *Restoration Ecology* 29, e13326. doi: [10.1111/rec.13326](https://doi.org/10.1111/rec.13326).

Dickie, I. A., Koide, R. T., and Fayish, A. C. (2001). Vesicular-arbuscular mycorrhizal infection of *Quercus rubra* seedlings. *New Phytologist* 151, 257–264. doi: [10.1046/j.1469-8137.2001.00148.x](https://doi.org/10.1046/j.1469-8137.2001.00148.x).

Jevon, F., Lang, A., Ayres, M., and Matthes, J. H. (2021). Limited evidence that larger acorns buffer *Quercus rubra* seedlings from density‐dependent biotic stressors. *Am J Bot* 108, 1–12. doi: [10.1002/ajb2.1740](https://doi.org/10.1002/ajb2.1740).

Jevon, F. V., Record, S., Grady, J., Lang, A. K., Orwig, D. A., Ayres, M. P., et al. (2020). Seedling survival declines with increasing conspecific density in a common temperate tree. *Ecosphere* 11, e03292. doi: [10.1002/ecs2.3292](https://doi.org/10.1002/ecs2.3292).

Lance, A. C., Carrino-Kyker, S. R., Burke, D. J., and Burns, J. H. (2020). Individual plant-soil feedback effects influence tree growth and rhizosphere fungal communities in a temperate forest restoration experiment. *Front. Ecol. Evol.* 7, 500. doi: [10.3389/fevo.2019.00500](https://doi.org/10.3389/fevo.2019.00500).

Lovelock, C. E., and Miller, R. (2002). Heterogeneity in inoculum potential and effectiveness of arbuscular mycorrhizal fungi. *Ecology* 83, 823–832. doi: [10.2307/3071884](https://doi.org/10.2307/3071884).

Mallik, A. U., Biswas, S. R., and Collier, L. C. S. (2016). Belowground interactions between *Kalmia angustifolia* and *Picea mariana*: roles of competition, root exudates and ectomycorrhizal association. *Plant and Soil* 403, 471–483. doi: [10.1007/s11104-016-2819-z](https://doi.org/10.1007/s11104-016-2819-z).

McCarthy-Neumann, S., and Ibáñez, I. (2012). Tree range expansion may be enhanced by escape from negative plant–soil feedbacks. *Ecology* 93, 2637–2649. doi: [10.1890/11-2281.1](https://doi.org/10.1890/11-2281.1).

McCarthy-Neumann, S., and Ibáñez, I. (2013). Plant-soil feedback links negative distance dependence and light gradient partitioning during seedling establishment. *Ecology* 94, 780–786. doi: [10.1890/12-1338.1](https://doi.org/10.1890/12-1338.1).

McCarthy-Neumann, S., and Kobe, R. K. (2010). Conspecific and heterospecific plant-soil feedbacks influence survivorship and growth of temperate tree seedlings. *Journal of Ecology* 98, 408–418. doi: [10.1111/j.1365-2745.2009.01620.x](https://doi.org/10.1111/j.1365-2745.2009.01620.x).

McCarthy-Neumann, S., and Kobe, R. K. (2019). Site soil-fertility and light availability influence plant-soil feedback. *Frontiers in Ecology and Evolution* 7, 1–10. doi: [10.3389/fevo.2019.00383](https://doi.org/10.3389/fevo.2019.00383).

Nagati, M., Roy, M., DesRochers, A., Bergeron, Y., and Gardes, M. (2020). Importance of soil, stand, and mycorrhizal fungi in *Abies balsamea* establishment in the boreal forest. *Forests* 11, 1–16. doi: [10.3390/f11080815](https://doi.org/10.3390/f11080815).

Nagendra, U. J., and Peterson, C. J. (2016). Plant-soil feedbacks differ in intact and tornado-damaged areas of the southern Appalachian Mountains, USA. *Plant and Soil* 402, 103–116. doi: [10.1007/s11104-015-2766-0](https://doi.org/10.1007/s11104-015-2766-0).

O’Brien, M. J., Gomola, C. E., and Horton, T. R. (2011). The effect of forest soil and community composition on ectomycorrhizal colonization and seedling growth. *Plant and Soil* 341, 321–331. doi: [10.1007/s11104-010-0646-1](https://doi.org/10.1007/s11104-010-0646-1).

Pfennigwerth, A. A., Van Nuland, M. E., Bailey, J. K., and Schweitzer, J. A. (2017). Plant-soil feedbacks mediate shrub expansion in declining forests, but only in the right light. *Journal of Ecology* 106, 179–194. doi: [10.1111/1365-2745.12833](https://doi.org/10.1111/1365-2745.12833).

Reinhart, K. O., and Callaway, R. M. (2004). Soil biota facilitate exotic *Acer* invasions in Europe and North America. *Ecological Applications* 14, 1737–1745. doi: [10.1890/03-5204](https://doi.org/10.1890/03-5204).

Reinhart, K. O., and Clay, K. (2009). Spatial variation in soil-borne disease dynamics of a temperate tree, *Prunus serotina*. *Ecology* 90, 2984–2993. doi: [10.1890/08-1380.1](https://doi.org/10.1890/08-1380.1).

Reinhart, K. O., Johnson, D., and Clay, K. (2012a). Conspecific plant-soil feedbacks of temperate tree species in the southern Appalachians, USA. *Plos One* 7, e40680. doi: [10.1371/journal.pone.0040680](https://doi.org/10.1371/journal.pone.0040680).

Reinhart, K. O., Johnson, D., and Clay, K. (2012b). Effects of trees on their recruits in the southern Appalachians, USA. *Forest Ecology and Management* 263, 268–274. doi: [10.1016/j.foreco.2011.09.038](https://doi.org/10.1016/j.foreco.2011.09.038).

Reinhart, K. O., Packer, A., Putten, W. H. V. der, and Clay, K. (2003). Plant–soil biota interactions and spatial distribution of black cherry in its native and invasive ranges. *Ecology Letters* 6, 1046–1050. doi: [10.1046/j.1461-0248.2003.00539.x](https://doi.org/10.1046/j.1461-0248.2003.00539.x).

Reinhart, K. O., Royo, A. A., Van der Putten, W. H., and Clay, K. (2005). Soil feedback and pathogen activity in *Prunus serotina* throughout its native range. *Journal of Ecology* 93, 890–898. doi: [10.1111/j.1365-2745.2005.01028.x](https://doi.org/10.1111/j.1365-2745.2005.01028.x).

Urli, M., Brown, C. D., Perez, R. N., Chagnon, P.-L., and Vellend, M. (2016). Increased seedling establishment via enemy release at the upper elevational range limit of sugar maple. *Ecology* 97, 3058–3069. doi: [10.1002/ecy.1566](https://doi.org/10.1002/ecy.1566).
